# Supplementary material for: The Current Landscape of Clinical Trials
Source: Preprints.org preprint supplement (doi:10.20944/preprints202409.0559.v1), 2024-09-06
Supplement: Supplementary file 1 [file supplementary]

Table S1: Synonyms of conditions or diseases

| SN | Disease/Condition | synonyms of conditions or diseases |
| --- | --- | --- |
| 1 | Heart diseases | heart; Cardiac; coronary; Hearts; Cardiac structure; Heart structure  heart diseases; Heart disease; Cardiac Disease; Cardiac Diseases; cardiopathy; Cardiac disorder; disease cardiac; disorder heart; cardiac disorders; cardiopathies; heart disorder; syndrome heart disease; diseases of the heart  diseases; Disease; Disorders; disorder; Diagnosis; condition; disease type; Other Disease |
| 2 | Cancer | cancer; Neoplasms; Tumors; Tumor; Neoplasm; malignancies; Cancers; Oncology; Malignancy; Tumour; tumours; Neoplasia; Malignant neoplasm; malignant tumors; Malignant tumor; Malignant Neoplasms; primary cancer; Neoplastic Disease; Cancer NOS; neoplasias; neoplastic syndrome; Primary Malignant Neoplasm; tumor NOS; Malignant tumour; Malignant neoplastic disease; malignant tumours; malignant neoplasm primary |
| 3 | Cerebrovascular diseases (stroke) | stroke; Cerebrovascular accident; cerebral stroke; Strokes; cerebrovascular stroke; cerebral vascular accident; Apoplexy; Brain attack; Cerebrovascular Accidents; Stroke Syndrome; Cerebrovascular Apoplexy; stroke cerebral; Stroke/cerebrovascular accident; Brain Vascular Accident; Cerebral vascular events; Stroke NOS |
| 4 | Chronic lower respiratory diseases | lower; lowering  respiratory; respiratory tract  respiratory diseases; Respiration Disorders; respiratory disease; respiratory disorder  diseases; Disease; Disorders; disorder; Diagnosis |
| 5 | Alzheimer diseases | alzheimer disease; Alzheimer's Disease; Alzheimers Disease; Alzheimer Dementia; Alzheimer's Dementia; dementia alzheimers; Dementia of the Alzheimer's type; Senile Dementia; Alzheimer Type Dementia; Familial Alzheimer disease; Dementia Alzheimer's type; Alzheimer Type Senile Dementia; alzheimer's diseases; familial alzheimer's disease; pN2; dats; Alzheimer Syndrome  disease; Disorders; Diseases; disorder; Diagnosis; disease type; condition |
| 6 | Diabetes | diabetes; Diabetes Mellitus; diabete mellitus; diabetes NOS |
| 7 | Nephritis, nephrotic syndrome and nephritis | nephritis; Inflammation of kidney; kidney inflammation  nephrotic syndrome; Nephrosis; Nephrotic Syndromes  syndrome; Syndromes |
| 8 | Chronic liver diseases and cirrhosis | chronic; Chronic graft versus host disease; Chronic GVHD  liver; Livers  liver diseases; Liver Disease; hepatic disease; Hepatopathy; Hepatic Diseases; liver disorder; Disorder of liver  diseases; Disease; Disorders; Diagnosis; disorder; condition; disease type  cirrhosis; Liver Cirrhosis; Cirrhosis liver; Hepatic Cirrhosis; cirrhosis of the liver; Cirrhosis of liver  cirrhosis liver; Cirrhosis; Liver Cirrhosis; Hepatic Cirrhosis; cirrhosis of the liver; Cirrhosis of liver |
| 9 | Covid-19 | covid; SARS-CoV-2; Severe Acute Respiratory Syndrome Coronavirus 2; Novel Coronavirus; SARS-CoV-2 Virus; COVID19 Virus; 2019-nCoV; 2019 novel coronavirus; SARS Coronavirus 2; SARS2; COVID 19 Virus; SARS CoV 2 Virus; Wuhan Coronavirus |
| 10 | Influenza and pneumonia | influenza; Influenza Vaccine; Flu; Influenza vaccines; Influenza virus vaccine; Flu vaccine; Fluzone; trivalent influenza vaccine; Fluarix; flumist; Human Influenza; Flu vaccination; influenza virus vaccine trivalent; Fluviral; Flu shot; Grippe; Influenza in Humans; Influenza Virus Vaccines; flu vaccines; Fluzone HD; FluLaval; fluvirin; Human Flu; Flucelvax; flus; Influenza in Human; flu syndrome; Trivalent Live-Attenuated Influenza Vaccine; Agriflu; Influenza NOS; flushield  pneumonia; Pneumonias; inflammation lungs |
| 11 | Essential Hypertension and hypertensive renal disease (essential hypertension OR hypertension renal disease) | essential hypertension; Primary hypertension; hypertension primary  hypertension; High blood pressure; arterial hypertension; Blood pressure high; Hypertension arterial; Elevated blood pressure; vascular hypertension; HTN - Hypertension; Hypertensive disease; hypertensive disorder; systemic hypertension; hyperpiesia; vascular hypertensive disorder; HBP; High Blood Pressures; hyperpiesis  hypertension renal disease; hypertensive kidney disease; hypertensive nephropathy; Hypertensive renal disease; Hypertension secondary to renal disease  renal; Kidney; Kidneys; Ren  renal disease; Kidney Diseases; Kidney disease; Nephropathy; nephropathies; kidney disorder; renal diseases; Renal disorder  disease; Diseases; Disorders; disorder; Diagnosis; condition; Other Disease |
| 12 | Septicemia | septicemia; Sepsis; toxemia; Bloodstream Infection; Bloodstream Infections; Sepsis Syndrome; Septicaemia; systemic infection; Systemic infections; Infection systemic; Systemic Sepsis |
| 13 | Parkinson diseases | parkinson's; Idiopathic Parkinson's disease; parkinson s disease; idiopathic parkinson disease; Primary Parkinsonism; parkinson's syndrome; Lewy Body Parkinson's Disease; Lewy Body Parkinson Disease; Paralysis Agitans; Shaking palsy; parkinson disease lewy body  diseases; Disease; Disorders; disorder; Diagnosis; condition |
